# Supplementary material
Source: Springer Nature journal article supplement (https://www.springermedizin.de/resource/supplementary/12960_2008_213_MOESM1_ESM.pdf/9570696)

**Legal Indications**

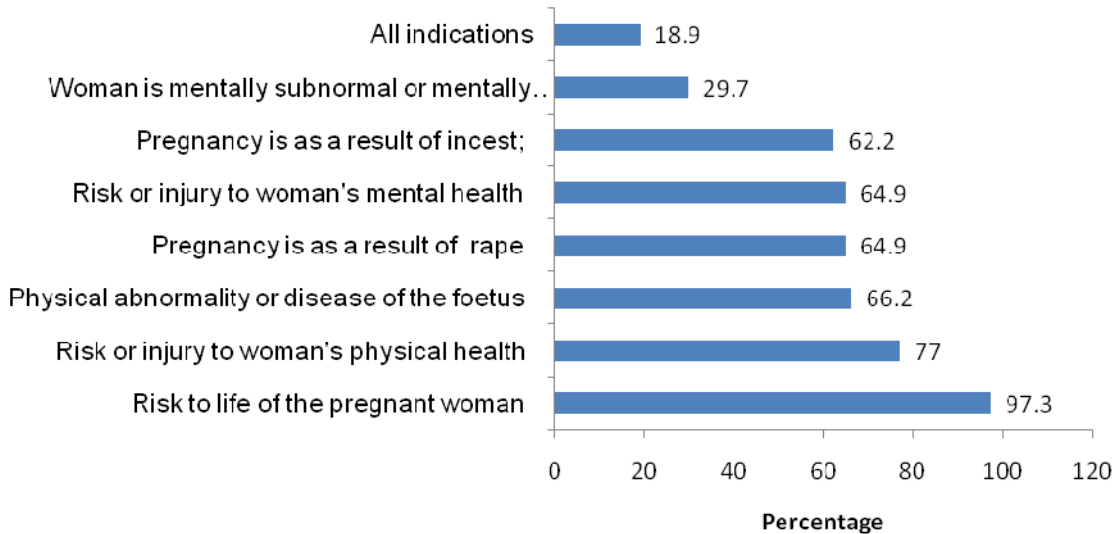

Supplement: MOESM1 [file 9570696]
